1 ***Plasmodium falciparum* growth is regulated by Sphingosine 1 phosphate**  
2 **produced by Host Erythrocyte Membrane Sphingosine kinase 1**

3

4

5 **Raj Kumar Sah<sup>1</sup>, Monika Saini<sup>1-2</sup>, Soumya Pati<sup>2</sup> and Shailja, Singh<sup>1\*</sup>**

6

7 <sup>1</sup>Special Centre for Molecular Medicine, Jawaharlal Nehru University, New  
8 Delhi, India

9 <sup>2</sup>Department of Life Sciences, School of Natural Sciences, Shiv Nadar  
10 University, Greater Noida, India

11

12

13 **\*Correspondence:**

14 Shailja Singh

15 [shailja.jnu@gmail.com](mailto:shailja.jnu@gmail.com)

16 [shailja.singh@jnu.ac.in](mailto:shailja.singh@jnu.ac.in)

17

18

19

20

21 **Key words: Sphingosine, Sphingosine-1-phosphate, Sphingosine-kinase**  
22 **Erythrocyte, host-parasite, metabolic-interactions**

23

24

25

26

27

28

29

30 **Abstract**

31 Sphingosine-1-phosphate (S1P) a bioactive lipid is produced in its primary  
32 reservoir, erythrocytes by an enzyme Sphingosine kinase-1 (SphK-1). The  
33 activation of such kinases and the subsequent S1P generation and secretion in  
34 the blood serum represent a major regulator of many cellular signaling  
35 cascades. Orthologue of sphingosine kinases 1 and 2 (SphK-1 and 2) that  
36 catalyze the phosphorylation of sphingosine generating S1P are not present in  
37 malaria parasite. The malaria parasite, *Plasmodium falciparum*, is an  
38 intracellular obligatory organism that reside in the human erythrocyte during its  
39 blood stage life cycle and orchestrates many metabolic interactions with host for  
40 its survival. Given the regulatory role of S1P, we targeted host SphK-1 by a  
41 generic pharmacological inhibitor N,N-Dimethyl-sphingosine (DMS) and  
42 analyzed growth of intra-erythrocytic parasite. We found that reducing S1P  
43 levels by inhibiting host SphK-1 activity led to halted parasite growth and  
44 ultimately cell death. Reduced intracellular S1P levels were attributed to  
45 decreased glycolysis marked by the low uptake of glucose by parasite and by  
46 less production of lactate, a byproduct of glycolysis. Reduced glycolysis was  
47 mediated by decrease translocation of the glycolytic enzyme, Glyceraldehyde 3-  
48 phosphate dehydrogenase (GAPDH) to the cytosol of infected erythrocytes and  
49 cell death. Knocking down of erythrocyte SphK-1 is not lethal to the host and  
50 being a host encoded enzyme, targeting it with safe and specific drugs will not  
51 lead to the problem of resistance; thus, SphK-1 represents a potent target for the  
52 development of therapeutics against intra-erythrocytic *P. falciparum*.

53

## 54 **Author Summary**

55 Erythrocytes membrane enzyme Sphingosine kinase-1 (SphK-1) produces  
56 Sphingosine-1-phosphate (S1P) a bioactive lipid by phosphorylation of  
57 Sphingosine (Sph). S1P generated by activation of SphK is prosurvival signal  
58 and regulate cell growth. The malaria parasite, *Plasmodium falciparum*, is an  
59 intracellular obligatory pathogen that reside in erythrocyte during its blood stage  
60 life cycle and orchestrates many metabolic interactions with its host  
61 erythrocytes for survival. Orthologue of SphK-1/ 2 are not present in malaria  
62 parasite, therefore treatment with SphK inhibitor targeted host SphK-1 and led  
63 to reduced S1P level. The reduction in host S1P led to halted parasite growth  
64 and cell death. Furthermore, reduced erythrocyte S1P levels led to decreased  
65 glycolysis marked by the low uptake of glucose by parasite and by less  
66 production of lactate. Erythrocyte SphK-1 being a host encoded enzyme, is  
67 resistance safe and represents a potent target for the development of  
68 therapeutics against intra-erythrocytic *P. falciparum*.

69

70

71

72

73

74

75

76

77

78

## 79 **Introduction**

80 An estimate of 219 million malaria cases and 435,000 related deaths were  
81 reported in 2017 worldwide according to World Health Organization[1]. The  
82 decrease in efficiency of current anti-malarial agents including artemisinin,  
83 quinine, chloroquine, piperaquine, mefloquine and their derivatives in malaria  
84 affected regions of the world has significantly increased the cost and complexity  
85 of curing malaria[2][3][4]. The limited number of available anti-malarial drugs  
86 and parasitic resistance to almost every available chemical therapy continues to  
87 spur the search for novel approaches. The next generation of anti-malarials are  
88 in pipeline and holds a great promise as they target novel parasite encoded  
89 enzymes and molecular pathways[5][6]. However, since these drugs target  
90 molecules that are under genetic control of the parasite, resistance against them  
91 can be developed in the long run[7][8]. To deal with the nuisance of drug  
92 resistance, targeting host encoded proteins that are indispensable for parasite  
93 growth and survival would be an ideal situation. Since, the chances of  
94 development of resistance against non-parasite targets are very bleak, host  
95 targeted drug development will be a classical addition to the field of drug  
96 discovery in malaria.

97 *P. falciparum* being an intracellular obligatory parasite exploits the host's  
98 resources and pathways for its survival and growth. For example, parasite feeds  
99 on erythrocytic hemoglobin content during the asexual blood stage  
100 development. The breakdown of hemoglobin provides amino acids for its  
101 growth and maturation[9]. Another important example is the metabolic pathway  
102 of glycolysis. It is well known that the parasite infected erythrocytes utilize  
103 glucose at a much higher rate than the normal parasite uninfected  
104 erythrocytes[10][11]. During the intra-erythrocytic growth phase, *Plasmodium*  
105 lacks a functional tricarboxylic acid (TCA) cycle (also known as Krebs cycle)

106 and is therefore, dependent on glycolysis for its energy requirements[12]. For  
107 glycolysis, the parasite makes use of pre-existing pools of host glucose as well  
108 as imports it by expressing glucose transporters on the surface of the host  
109 erythrocytes[13]. The parasite's sole dependence on glycolysis for energy needs  
110 makes it a potential target for anti-malarial chemotherapies. However, the  
111 regulation of glycolysis by parasites in infected erythrocytes is not very  
112 clear[14]:[15]:[16].

113 A recent study demonstrates that intracellular S1P facilitates glycolysis in  
114 erythrocytes in response to hypoxia[17]. This biolipid is involved in various  
115 other biological processes including immune response[18], bone marrow cells  
116 trafficking [19], vascular integrity[20], cell survival and proliferation[21].  
117 Given the diverse roles of S1P, various cell types have been identified as  
118 production and store house of S1P including erythrocytes, endothelial cells,  
119 thrombocytes, mast cells, and macrophages[22]:[23]. However, erythrocytes  
120 have been considered as the main repository for S1P in the blood  
121 plasma[22]:[24]. Several reasons have been held responsible for the elevated  
122 S1P content in these cells including high sphingosine kinase (SphK) activity,  
123 lack of S1P degrading enzymes (S1P lyase and S1P phosphohydrolase) and its  
124 capability to import sphingosine from extracellular environment[25]:[26].  
125 Surprisingly, the role of multi-faceted S1P in erythrocytes and what affect it  
126 exerts on the physiology of the cells remains an unexplored mystery. S1P is  
127 produced through hydrolysis of sphingomyelin to ceramide by  
128 sphingomyelinases, followed by sphingosine synthesis from ceramide via the  
129 action of cermidases, and finally phosphorylation of sphingosine via  
130 sphingosine kinases (SphK) produces S1P[27]. S1P is basically a  
131 phosphorylated product of sphingosine produced by kinases, sphingosine  
132 kinase-1 and -2 (SphK-1 and SphK-2)[28]. While SphK-1 is localized to the

133 cytosol, SphK-2 resides in the nucleus[29][30]. Erythrocytes harbor only SphK-  
134 1 which is the main enzyme responsible for the production of S1P in  
135 them[22][24]. Phosphorylation of host SphK-1 acts as a key regulating factor  
136 for its activity. SphK-1 selectively binds to phosphatidylserine in the membrane  
137 and phosphorylation at serine 225 is essential for its increased selective  
138 membrane binding capability[28]. Intracellular erythrocytic S1P binds to  
139 deoxygenated-hemoglobin, translocates to the membrane and mediates the  
140 release of the glycolytic enzyme, GAPDH, which in turn regulates the  
141 erythrocytic glycolysis pathway[17]. Apart from being synthesized within the  
142 erythrocytes, S1P gets secreted out in the blood plasma via a specific S1P  
143 transporter major facilitator superfamily transporter (Mfsd2b)[31].

144 With this background, we aimed to study the role of host SphK-1 in regulation  
145 of parasite growth inside the host erythrocytes. We demonstrated inhibition of  
146 host SphK-1 by N,N-Dimethylsphingosine (DMS) lowered S1P levels in the  
147 host. The Inhibition of host SphK-1 led to the reduction in glycolysis and cell  
148 death of parasite. The Inhibition of SphK-1 was found to be associated with  
149 reduction in cytosolic presence of glycolytic enzyme GAPDH. Glycolysis in  
150 normal erythrocytes is mainly regulated by an essential cytosolic enzyme,  
151 GAPDH, which remains bound to the membrane unless required during  
152 glycolysis[32]. Thus, reduction of cytosolic GAPDH leads to lowered activity in  
153 parasite-infected erythrocytes can be an explanation for parasite death. Since  
154 deletion of host SphK-1 does not have any adverse effect on host, we advocate  
155 the targeting of host SphK to kill parasite for the development of potent anti-  
156 malarial drugs. Also, since it is a host-encoded enzyme, the possibility of the  
157 resistance development by the parasites is diminished.

## 158 **Materials and methods**

### 159 **Cultivation of *P. falciparum*–infected erythrocytes**

160 *P. falciparum* 3D7 strain was cultured in RPMI 1640 (Invitrogen, Carlsbad, CA,  
161 USA) supplemented with 27.2 mg/L hypoxanthine (Sigma-Aldrich, St. Louis,  
162 MO, USA), 2 gm/L sodium bicarbonate (Sigma-Aldrich, St. Louis, MO, USA)  
163 and 0.5 gm/L AlbuMax I (Gibco, Grand Island, NY, USA) using O+ human  
164 erythrocytes, under mixed gas environment (5% O<sub>2</sub>, 5% CO<sub>2</sub> and 90% N<sub>2</sub>) as  
165 described previously[33]. For the assessment of half-maximal drug  
166 concentration for inhibition of malaria survival (IC<sub>50</sub>) values, synchronized *P.*  
167 *falciparum* infected erythrocyte cultures were used at late-ring or early  
168 trophozoite stage (18-24 hours post infection (hpi)) at a parasitemia of 1%.  
169 Where indicated, cultures were treated with the DMS inhibitor (Sigma-Aldrich,  
170 St. Louis, MO, USA) at concentrations ranging from 0 to 40 μM. Untreated  
171 controls were cultured in parallel under the same conditions and processed  
172 identically. To assess total parasitemia, cultures were collected at the indicated  
173 times and freeze-thawed. The lysates were processed for SYBR-green staining  
174 (Thermo Fisher Scientific, Waltham, Massachusetts, US). Briefly, equal  
175 volumes of lysis buffer containing 20 mM tris (pH 7.5), 5 mM EDTA, 0.008%  
176 saponin (w/v), and 0.08% triton X-100 (v/v) was added to the lysed parasites  
177 and incubated for 3 hours at 37°C with 1X SYBR-green dye. Fluorescence after  
178 the SYBR-green assay was recorded in a multimode plate reader (BioRad) at  
179 an excitation and emission wavelength of 485 nm and 530 nm, respectively.  
180 Percent growth inhibition was calculated using the following formula: %  
181 Growth Inhibition =  $\{(Control - Treated) / (Control) * 100\}$ . The effect of DMS  
182 was tested on progression of the parasites treated at ring stage and monitored till  
183 different developmental asexual stages, namely, rings, trophozoites, schizonts  
184 and release of merozoites from schizonts. Tightly synchronized ring stage  
185 parasite cultures treated with 10 μM DMS inhibitor or solvent as control were  
186 incubated for 0, 18, 34, 45 hours blood stage asexual cycle to monitor the  
187 progression at each stage. Morphological analysis and counting (~3,000 cells/

188 Giemsa-stained slides in duplicate) were done at each of these stages to monitor  
189 the parasite's progression.

190 **Analysis of morphological changes in infected and uninfected erythrocytes**  
191 **by Scanning Electron Microscopy (SEM) after DMS treatment**

192 The infected and uninfected erythrocytes were treated with DMS (10  $\mu$ M) for a  
193 period of 5 hours. Following incubation erythrocyte and infected erythrocyte  
194 were washed three times in sterile PBS. The samples were then fixed by 2.5%  
195 glutaraldehyde in 1X PBS (pH 7.4) with 2% formaldehyde for a period of 30  
196 minutes. Post fixation, samples were rinsed thrice with 1X PBS and dehydrated  
197 in absolute ethanol series (ethanolic dehydration), using a standard protocol.  
198 Samples were then completely dried, coated with gold, and observed under the  
199 scanning electron microscope.

200 **Extraction of Lipids and Sphingosine-1-Phosphate Measurement**

201 Equal number of synchronous parasitized erythrocytes at 7-8% parasitaemia,  
202 and uninfected erythrocytes both in presence and absence of DMS for a period  
203 of 5 hours were used for further experiments. Collected cell pellets and  
204 supernatant were employed for lipid extraction as reported previously [34].  
205 Pellets were resuspended in 100  $\mu$ l H<sub>2</sub>O and transferred to 900  $\mu$ l methanol.  
206 Whereas, for quantification of S1P in supernatant, 1:15 ratio of methanol was  
207 used. After vortexing and centrifugation at 10,000  $\times g$  for 5 minutes at RT,  
208 methanol extracts were removed to a new glass tube. After evaporation by N<sub>2</sub>,  
209 dried lipids were resuspended in 200  $\mu$ l methanol. Extracted lipid samples were  
210 subjected to liquid-chromatography mass-spectrometry (LC/MS) analysis. We  
211 used a Waters Acquity H-Class UPLC-system (Waters, Milford, MA, USA).  
212 Chromatographic separation was achieved on an Acquity BEH C18, 1.7  $\mu$ m,  
213 75  $\times$  2.1 mm column (Waters, Manchester, UK). Mass spectrometry was  
214 performed in negative electrospray mode using a high-resolution mass



215 spectrometer synapt G2 S HDMS (Waters, Manchester, UK) with a TOF-  
216 detector with linear dynamic range of at least 5000:1. The mass spectra were  
217 acquired over the range of 100–1000 Da with a spectral acquisition rate of  
218 0.1 seconds per spectrum.

219 For S1P measurement by enzyme-linked immunosorbent assay (ELISA)  
220 (MyBioSource, San Diego, USA) method, parasite infected and uninfected  
221 erythrocytes were treated with 10  $\mu$ M DMS for 5 hours at 37°C. Collected  
222 supernatant was used to measure extracellular S1P, whereas, the lysed  
223 erythrocytes were used to measure intracellular S1P level. The samples were  
224 added to the micro ELISA plate wells separately, pre-coated with S1P-specific  
225 antibody for 90 minutes at 37°C followed by probing with a biotinylated  
226 detection antibody specific to human S1P and incubation for 1 hour at 37°C.  
227 After washing, Avidin-horseradish peroxidase (HRP) conjugate was added  
228 successively to each microplate well and incubated for 30 minutes at 37°C. The  
229 wells were washed to remove the unbound components followed by addition of  
230 substrate solution to each well. Only those wells that contained S1P,  
231 biotinylated detection antibody and Avidin-HRP conjugate appeared blue in  
232 color. The enzyme-substrate reaction was terminated by addition of stop  
233 solution turning the reaction color to yellow. The optical density (O.D.)  
234 proportional to the S1P level was measured spectrophotometrically at a  
235 wavelength of 450 nm.

236

### 237 **Fluorescence microscopy for uptake of NBD-Sphingosine in infected** 238 **erythrocyte.**

239 Washed infected erythrocyte ( $1 \times 10^8$ /mL) were incubated with 1  $\mu$ M N,N  
240 Dimethyl sphingosine (Sigma Aldrich) or 1  $\mu$ M omega (7-nitro-2-1, 3-  
241 benzoxadiazol-4-yl)(2S,3R,4E)-2-amino octadec-4- ene-1,3-diol (NBD–

242 sphingosine; Avanti Polar Lipids) for 15 min at 37 °C. The infected  
243 erythrocytes were pelleted at 550 ×g for 5 min and resuspended in fresh  
244 incomplete RPMI media. Approximately 100 µL of the samples was placed  
245 onto a glass bottom petri dish. The cells were then allowed to settle at RT for 5  
246 min and were viewed using a confocal Nikon Ti2 microscope equipped with a  
247 100× oil objective (Melville, NY). Digital images were captured. Further,  
248 images were processed via NIS-Elements software.

249

### 250 **Immunofluorescence assay and immunoblotting for SphK-1 and GAPDH** 251 **in erythrocytes**

252 For immunofluorescence assays, thin smears of schizont or mixed stage  
253 parasites treated or untreated with DMS were made on glass slides, air dried and  
254 fixed with methanol (ice cold) for 30 minutes at -20°C. Smears were blocked  
255 with 3% (w/v) bovine serum albumin (BSA) in phosphate buffer saline (PBS)  
256 blocking buffer (pH 7.4) for 30 minutes at room temperature (RT). Slides were  
257 probed with anti-SphK-1 (Invitrogen, Carlsbad, CA, USA, 1:1000) rabbit and  
258 anti-GAPDH (Invitrogen, Carlsbad, CA, USA, 1:500) mouse antibodies in  
259 blocking buffer at RT for 1 hour. After washing, slides were incubated with  
260 Alexa Fluor 594 conjugated goat anti-rabbit IgG (Molecular Probes, USA,  
261 1:500) and Alexa Fluor 488 conjugated goat anti-mouse IgG (Molecular Probes,  
262 USA, 1:500) at RT for 1 hour. After washing, the slides were mounted in  
263 ProLong Gold antifade reagent (Invitrogen, Carlsbad, CA, USA), viewed on a  
264 Nikon A1-R confocal microscope and Olympus confocal microscopy. Further,  
265 images were processed via NIS-Elements software.

### 266 **Immunoblotting for SphK-1 and GAPDH in erythrocytes**

267 Parasite infected and uninfected erythrocytes in the presence or absence of  
268 DMS were lysed by freeze-thawing in 10 volumes of 5 mmol/L cold phosphate  
269 buffer (pH 8.0) with 1X protease inhibitor cocktail (PIC), vortexed and  
270 erythrocyte membrane pellets were separated from cytosolic fraction by  
271 centrifugation at 20,000  $\times g$  for 20 minutes at 4°C. The fractionated pellets were  
272 washed ten times with phosphate buffer to obtain ghost erythrocytes. Total cell  
273 pellet of parasite infected and uninfected erythrocytes were re-suspended in  
274 RIPA buffer [100 mM phosphate buffer pH 7.2, 150 mM NaCl, 1% NP-40,  
275 0.5% sodium deoxycholate, 0.1% SDS, 50 mM EDTA and 1X PIC. Equal  
276 amounts of each sample were boiled with 2X Laemmli buffer, separated on a  
277 10% polyacrylamide gel, transferred onto the PVDF membranes (Millipore)  
278 followed by blocking with 5% skim milk blocking buffer for 1 hour at 4°C.  
279 After washing, blots were incubated for 1 hour with anti-SphK-1 (1:3000), anti-  
280 Phospho-SphK-1 (Ser225) (Invitrogen, Carlsbad, CA, USA, 1:1000) rabbit and  
281 anti-GAPDH (Invitrogen, Carlsbad, CA, USA, 1:10,000) mouse antibodies in  
282 blocking buffer. Later, the blots were washed and incubated for 1 hour with  
283 appropriate secondary antibodies anti-rabbit and anti-mouse (1:10,000)  
284 conjugated to HRP. Immunoblotted proteins were visualized by using the  
285 Clarity Western ECL substrate (Bio-Rad).

## 286 **Glycolysis estimation by lactate level measurement and glucose uptake**

287 Glycolysis estimation was performed using lactate assay kit (Sigma-Aldrich, St.  
288 Louis, MO, USA). Parasite infected and uninfected erythrocytes were  
289 resuspended in cRPMI containing 10  $\mu M$  DMS and incubated for 3 hours at  
290 37°C. The supernatant was separated by centrifugation at 5000  $\times g$  for 10  
291 minutes at RT and lactate levels were measured in supernatant and lysed  
292 erythrocytes according to the manufacturer's protocol. Glucose uptake into the  
293 parasites was quantified with 2-(*N*-(7 Nitrobenz-2-oxa-1, 3-diazol-4-yl)

294 Amino)-2-Deoxyglucose (2-NBDG) (Sigma-Aldrich, St. Louis, MO, USA)  
295 via fluorescence labelling and flow cytometry. 2-NBDG is a fluorescent D-  
296 glucose derivative and acts as a tracer. Synchronized trophozoite stage parasites  
297 were treated with 10  $\mu$ M DMS and incubated for 3 hours at 37°C. The parasite  
298 medium was replaced with RPMI without glucose supplemented with 0.3 mM  
299 2-NBDG followed by incubation for 20 minutes at 37°C to allow uptake of the  
300 glucose analogue. Cells were viewed on a Nikon A1-R confocal microscope  
301 (Nikon, Tokyo, Japan) and further, images were processed via NIS-Elements  
302 software. For flow cytometry, analysis was done on BD LSR Fortessa flow  
303 (Franklin Lakes, NJ) and FlowJo software.

#### 304 **Statistical Analysis**

305 The data for all the assays are expressed as the mean  $\pm$  standard deviation (SD)  
306 of three independent experiments done in triplicates.

## 307 **RESULTS**

### 308 **Inhibition of host SphK-1 activity by specific inhibitor DMS decreases both** 309 **intracellular and extracellular S1P levels**

310 Physiologically, the main reservoir of circulating S1P is erythrocytes, which are  
311 rich in SphK-1 while devoid of S1P lyase and sphingolipid transporter 2  
312 (SPNS2)[25][26]. Hence, modulation of SphK-1 level could mediate change in  
313 the levels of circulating or intracellular S1P concentration. Therefore, we  
314 determined the level of SphK-1 in parasite infected and uninfected erythrocytes  
315 by immunolabelling and immunoblotting. For immunolabelling, mixed stage  
316 parasites were probed with anti-SphK-1 antibody. Significant reduction in  
317 SphK-1 levels was found after treatment with DMS in parasite infected  
318 erythrocytes as compared to control by two different technique. (**Fig. 1a**). To  
319 further understand, if host Sphk-1 activity might be governed by

320 phosphorylation, we have evaluated the phosphorylation status of host SphK-1  
321 in presence of its specific inhibitor (DMS), by probing lysate of infected  
322 erythrocytes with specific anti-SphK-1 and Phospho-SphK-1 (Ser225)  
323 antibodies. Whereas, GAPDH was used as a loading control. In line with the  
324 previous result, host SphK-1 level was found to be reduced in parasite infected  
325 erythrocytes and uninfected erythrocyte treated with DMS as compared to the  
326 untreated (**Fig. 1b**). Moreover, the phosphorylated form of host SphK-1  
327 (pSphK-1) was significantly reduced in parasite infected erythrocytes and  
328 uninfected erythrocyte following DMS treatment. The band intensities were  
329 quantified to confirm the relative changes in both level of SphK-1 and  
330 phosphorylation status (**Fig. 1b**).

331 Similar results were obtained in a study done parallelly wherein, host SphK-1  
332 level and activity was found to be regulated upon parasite infection to human  
333 erythrocytes (manuscript in review with Frontiers). Further, to determine  
334 whether host SphK-1 inhibition during parasite infection poses any alteration in  
335 S1P levels, we detected the relative levels of S1P in intracellular (**IC**) and  
336 extracellular (**EC**) milieu of the erythrocytes through LC/MS analysis and  
337 ELISA based kit. Lipid extracts were prepared from *P. falciparum* infected  
338 and/or uninfected erythrocytes in the presence or absence of 10  $\mu$ M DMS and  
339 samples were then subjected to LC/MS analysis[34]. A characteristic peak at  
340 position  $\sim$  378.16 in MS spectra was detected for S1P in all the experiments  
341 (**Supplementary Figure 1, 2 (A-H)**). Interestingly, the S1P level in DMS-  
342 treated infected erythrocytes was almost non-detectable, while the untreated  
343 infected erythrocytes demonstrated drastic reduction in S1P levels in both in IC  
344 and EC microenvironments. While DMS-treated healthy erythrocytes showed  
345 significant reduction in S1P levels from both IC and EC (**Supplementary**  
346 **Figure 1**). In order to validate the regulation of S1P levels by DMS, ELISA-  
347 based quantification was performed. The findings revealed significant down

348 regulation in S1P levels in DMS-treated infected erythrocytes, as compared to  
349 untreated infected erythrocytes. Whereas, DMS treatment led to ~50% reduction  
350 in both EC and IC profiles of healthy erythrocytes, when compared to untreated  
351 healthy controls (**Fig. 1c**). These results implicated reduced SphK-1 activity in  
352 infected erythrocytes congruent to the effect observed in the uninfected cells on  
353 DMS treatment.

354 Further, we examined whether DMS affect the uptake of NBD-sphingosine or  
355 not. For this the infected erythrocyte were incubated with NBD-sphingosine,  
356 when NBD-sphingosine added to erythrocyte it incorporated on erythrocyte  
357 membrane and get phosphorylated by SPHK-1 into NBD-S1P. phosphorylate by  
358 SphK-1 and convert into NBD sphingosine 1 phosphate.[35] The result shows  
359 that incubation of infected erythrocyte with NBD-sphingosine it get  
360 incorporated into the erythrocyte membrane and parasite and shows  
361 fluorescence which suggest the uptake of NBD sphingosine. To further  
362 investigate whether the infected RBCs in presence of DMS shows the same  
363 phenomenon we incubate the infected RBCs with NBD-sphingosine and DMS.  
364 After treatment incubation was done for 15min at 37 and we found that in  
365 treated sample NBD-sphingosine get less incorporated in parasite as well as on  
366 erythrocyte membrane as compared to the control one. (**Fig. 1d**).

367 This data suggests that inhibition of Sphk-1 by DMS causes less uptake of  
368 NBP-sphingosine as well as less production of S1P which is supported via LC-  
369 MS profiling

370

### 371 **Inhibition of erythrocytic SphK-1 triggers parasite death**

372 To decipher the link between host SphK1 activity and parasite growth, we have  
373 elucidated the effect of DMS on synchronized parasite cultures at ring stage.  
374 DMS treatment was done in an increasing manner (0, 5, 10, 20, 30 and 40  $\mu$ M)

375 for 48 hours. After completion of one asexual life cycle of the parasite, SYBR-  
376 green was added for assessing the percentage inhibition by DMS. The data  
377 revealed a moderate to potent anti-malarial activity of DMS with a significant  
378 reduction in the parasite load, with IC<sub>50</sub> value attended at 14 μM (**Fig. 2a**). To  
379 examine its impact on stage specific inhibition of parasite progression, highly  
380 synchronized ring stage parasites were treated with 10 μM DMS and their  
381 development were monitored at different time intervals (0, 18, 34, 45 hpi) by  
382 preparing thin blood smears of the treated and untreated infected erythrocytes.  
383 As observed in the blood smears, DMS drastically affected progression of the  
384 parasite from rings to trophozoites, stalling the parasite progress at the ring  
385 stage as compared to the untreated parasite infected control. Halt in the parasite  
386 growth could be accounted to the formation of ‘pyknotic body’ after 36 hours of  
387 the treatment (**Fig. 2b**). This progression arrest coincided with a significant drop  
388 in the S1P levels of the erythrocytes after DMS treatment. These findings  
389 strongly support the hypothesis, which suggested that SphK-1 mediated  
390 production of S1P plays an important role in *Plasmodium* growth and  
391 development in the erythrocytes. Further, to ascertain whether the host SphK-1  
392 inhibition mediated retardation of parasite growth and progression in  
393 independent of DMS-induced topological aberration in host membrane, we have  
394 performed SEM-based imaging of both infected and uninfected erythrocytes in  
395 presence of DMS. The SEM micrographs hardly show any significant changes  
396 in infected erythrocytes, following DMS treatment as compared to the  
397 respective untreated control (**Fig. 2c**). Similar observation could also be inferred  
398 from the experiments involving uninfected erythrocytes treated with DMS (**Fig.**  
399 **2c**).

#### 400 **Inhibition of erythrocyte SphK-1 results in decrease in lactate production**



401 The intra-erythrocytic stages of *P. falciparum* lack a functional citric acid cycle  
402 and is largely reliant on glycolysis to fulfill its very substantial energy  
403 requirements[36][37]. Erythrocytes infected with mature trophozoite stage  
404 parasites consume glucose up to two folds of magnitude faster than uninfected  
405 erythrocytes, eventually converting it to lactic acid[10][11][38]. To dissect this  
406 mechanism of SphK-1 dependent growth progression in parasite infected  
407 erythrocytes, and its link to glycolysis, we estimated the amount of lactate  
408 formation, an indicator of glycolytic process, in both infected and uninfected  
409 erythrocytes in presence of 10  $\mu$ M DMS for 3 hours. The findings suggested a  
410 prominent reduction in lactate production in DMS-treated infected and  
411 uninfected erythrocytes, as compared to respective untreated controls (**Fig. 3a**).  
412 Interestingly, parasite stage-specific estimation of lactate levels during intra  
413 erythrocytic cycle, represented predominant decrease in lactate production, as  
414 clearly evident in rings, trophozoites and schizonts (**Fig. 3b**), following  
415 treatment with 10  $\mu$ M of DMS for 3 hour. These data depict that; lowering of  
416 S1P levels by DMS-based inhibition of host SphK1 can lead to compromised  
417 glycolysis, which is manifested as reduced lactate levels in intra-erythrocytic  
418 cycle of *P. falciparum*.

419 To gain further insight, whether the observed metabolic alterations after  
420 inhibitor treatment were mediated specifically through erythrocytes or it directly  
421 impacted the parasite, we have elucidated the changes in lactate levels in host-  
422 free parasite isolated by saponin lysis, in response to the inhibitor. To  
423 determine the intrinsic lactate level of the trophozoite stage along with the  
424 saponin lysed host-free parasites were treated with the inhibitor for 2 hours.  
425 Interestingly, the lactate levels were found to be lowered as compared to their  
426 respective untreated controls except in the case of saponin lysed parasites  
427 wherein, there was no significant difference in the lactate levels of DMS treated



428 and untreated parasites could be detected (**Fig. 3c**). Lowering of lactate levels  
429 could be accountable to either down regulated glycolysis rate and/or reduced  
430 glucose uptake in trophozoite infected and uninfected erythrocytes. However,  
431 saponin lysed/host-free DMS treated trophozoites demonstrated negligible  
432 difference in the lactate levels as compared to the untreated control, suggesting  
433 erythrocytes as the mediator of S1P-dependent glycolysis not the parasite (**Fig.**  
434 **3c**). Altogether, these readouts suggested that host SphK-1 contributes to the  
435 regulation of glycolysis and its effect on parasite growth is mediated solely  
436 through the erythrocyte.

### 437 **Abrogated S1P synthesis results in reduced glucose uptake**

438 Further, we investigated the role of S1P in glucose uptake and glycolysis, as  
439 erythrocytes are solely dependent on glycolysis to meet their energy  
440 requirements. Towards this, we measured the glucose uptake in parasite-  
441 infected erythrocytes via fluorescence labelling and fluorescence-activated cell  
442 sorting (FACS) using a non-metabolizable glucose analog, 2-NBDG, which is  
443 fluorescently tagged. 2-NBDG accumulates inside the cells by entering through  
444 the glucose transporters but it does not enter into the glycolysis  
445 pathway[38][39][40]. Parasite infected erythrocytes were pre-incubated with  
446 DMS or solvent control for 3 hours at 37°C. The cells were then incubated with  
447 fluorescently labeled 2-NBDG and its uptake was measured after washing the  
448 cells with PBS using confocal microscopy and flow cytometry. Live-cell  
449 imaging of DMS-treated infected erythrocytes represented drastic reduction in  
450 glucose uptake, as represented by diminished green fluorescence indicating  
451 lower uptake of 2-NBDG. While, the untreated infected erythrocytes displayed  
452 prominent green fluorescence suggesting healthy uptake of glucose analogues  
453 (**Fig. 4a**). The fluorescence intensities were plotted using Image J for the  
454 treated and untreated cells indicating the same (**Fig. 4a**). To confirm whether

455 the impaired uptake of glucose analogue in DMS-treated infected erythrocytes  
456 was due to dysregulated glycolysis but not compromised cell viability, we used  
457 a strategy using dual dye-based assay. Regarding this, we have used Syto9 in  
458 combination with Propidium Iodide (Thermo Fisher Scientific, Waltham,  
459 Massachusetts, US) to delineate viability in DMS-treated infected erythrocytes.  
460 The finding revealed that the viability was uncompromised in DMS-treated  
461 infected erythrocytes with significant reduction in 2-NBDG uptake, suggesting  
462 the impairment in glucose uptake was mainly due to altered S1P level following  
463 host SphK-1 inhibition by DMS. Further, flow cytometry analysis of 2-NBDG  
464 uptake in DMS-treated infected erythrocytes demonstrated a 10-fold shift in  
465 fluorescence intensity indicating enhanced uptake of 2-NBDG, whereas, the  
466 untreated infected erythrocytes showed severe depletion in 2-NBDG uptake, as  
467 shown by diminished intensity peak in representative histogram (**Fig. 4b**).  
468 These results suggested that the uptake of glucose analogue, a signature of  
469 healthy glycolysis, was strongly repressed by the host SphK-1 inhibition as  
470 compared to their respective controls.

471 **Inhibition of erythrocyte SphK-1 leads to change in translocation of**  
472 **glycolytic enzyme GAPDH from membrane-to-cytosol**

473 Intracellular S1P in erythrocytes has been known to release membrane-bound  
474 GAPDH, a glycolytic enzyme to cytosol in response to hypoxia[17]. Since, host  
475 SphK-1 inhibition led to depletion in S1P levels in infected erythrocytes, we  
476 assumed translocation of GAPDH from membrane to cytosol might be also be  
477 hampered in DMS-treated infected erythrocytes. To validate the same, we  
478 checked the levels of GAPDH in cytosolic and membrane fractions of parasite  
479 infected and uninfected erythrocytes. The GAPDH level was detected by  
480 immunoblotting and immunolabelling. The total cell lysate was used as a  
481 control. After DMS treatment, both the membrane and cytosolic fractions were

482 separated for probing with anti-GAPDH mouse antibody. As expected, DMS  
483 treatment restricted the translocation of GAPDH to the erythrocyte membrane,  
484 as evident in immunoblot and its respective band intensities in both membrane  
485 and cytosolic fractions (**Fig. 5a**). These findings confirmed low release of  
486 GAPDH to the cytosol due to altered glycolysis in DMS-treated infected  
487 erythrocytes. Further, we visualized the localization of GAPDH in the cells by  
488 immunolabelling using confocal imaging. After DMS treatment, GAPDH was  
489 mainly restricted to the erythrocytic membrane rather than translocating to the  
490 cytosol, suggesting decreased glycolysis, which can be corroborated to our  
491 previous findings (**Fig. 5b**). Collectively, these results suggested low S1P levels  
492 in DMS-treated infected erythrocytes can lead to aborted glycolysis.

## 493 **Discussion**

494 It is noteworthy that, circulating erythrocytes demonstrate high storage of S1P,  
495 a crucial signaling biolipid, as compared to other peripheral tissues, especially  
496 due to lack of S1P degrading enzyme, Sphingosine 1 phosphate lyase  
497 (SPL)[17]. However, the erythrocytes do express S1P transporter Mfsd2b[31]  
498 and the concentration gradient of S1P from circulating erythrocytes to  
499 peripheral tissues governs several critical physiological processes, including  
500 vascular integrity, trafficking of lymphocytes and bone homeostasis  
501 *etc*[41][20][42].

502 S1P also play as a rheostat for maintaining balance between cytoysis and  
503 apoptosis[43]. In addition, the SphK-1/S1P signaling nexus contributes to the  
504 development and progression of various diseases including, Huntington's  
505 disease [44] and ulcerative colitis[45] *etc*. Thus, modulation of SphK-1 enzyme  
506 and its products have become the prime target in order to reduce the disease  
507 severity[46][47]. S1P is catalyzed by two isoforms of Sphingosine kinase,  
508 SphK (isoforms SphK-1 and SphK-2), and can turn on various cellular

509 processes by activating a family of G protein-coupled receptors, sphingosine-1-  
510 phosphate receptor 1-5 (S1P<sub>1-5</sub>)[48].

511 Accumulating body of evidences reveal strong role of deregulated S1P  
512 metabolism in parasite-born diseases, including trypanosomiasis, leishmaniasis  
513 and cerebral malaria[49][50][51]. However, studies involving host-SphK1  
514 mediated manipulation of parasite growth and progression are still at their  
515 infancy and unraveling the same would provide a breakthrough to present  
516 alternative targets for the drug therapies. With this perspective, we have  
517 delineated the possible role of host-SphK1 activity on growth and progression  
518 of *P. falciparum*, the causative agent of malaria, one of the deadly parasitic  
519 diseases.

520 To achieve this, we targeted host SphK-1 activity by using a specific inhibitor  
521 DMS, which completely depleted the S1P levels in both IC and EC of infected  
522 erythrocytes, leading to stalled the parasitic growth and progression with  
523 formation of ‘pyknotic bodies’ (**Fig. 1, 2**). To negate the possibility of DMS-  
524 enforced topological alterations in infected erythrocytes as the basis of aborted  
525 parasite growth and invasion, we have performed SEM-based analysis of both  
526 uninfected and infected erythrocyte membranes after DMS treatment. To  
527 emphasize, there was no significant changes could be identified in membrane  
528 structures of infected erythrocytes even after DMS treatment (**Fig. 2c**). Similar  
529 inference was drawn from the experiment involving uninfected erythrocytes  
530 with DMS (**Fig. 2c**). Since erythrocytes mainly harbor SphK-1, but no S1P  
531 receptor for its innate signaling, we hypothesized that inhibiting host-SphK1,  
532 might be attenuating the host-S1P dependent parasite survival mechanism as  
533 well. During *Plasmodium* infection, erythrocytes demonstrate 6-fold increase in  
534 phospholipids (PL), along with a sharp rise in glycolytic flux, with glucose  
535 uptake upto 50 folds, predominant in metabolically progressive stages such as

536 (trophozoite and schizont)[52][53][54] suggesting host-dependency of the  
537 parasite for fulfilling its metabolic needs[55].

538 To understand, whether inhibition of host-SphK1 during infection might block  
539 glycolysis in metabolically active stages of *P. falciparum*, mainly in trophozoite  
540 and schizont; we have estimated the levels of lactate, a signature metabolite in  
541 the same following DMS treatment. The results depict, drastic switch of  
542 metabolically active stage of parasites to metabolically dormant state, leading to  
543 parasite growth retardation (**Fig. 2, 3**). This data strongly advocated the role of  
544 host-SphK1 in regulation of glycolysis-dependent growth and progression of  
545 parasites. Further, to confirm the hypothesis, which suggested that altered  
546 glycolysis of intra-erythrocytic cycles is mediated specifically through  
547 erythrocytes not via the parasites; we also estimated the lactate levels in DMS-  
548 treated saponized/host-free parasites, as a proof-of-concept. The observation  
549 clearly ruled out the involvement of parasite-mediated glycolysis, as no change  
550 in lactate levels could be detected in host-free parasites (**Fig. 3**). To elucidate  
551 the impact of host SphK-1 inhibition on glucose uptake, during intra-  
552 erythrocytic development, we have measured the live uptake of glucose using a  
553 fluorescent-labeled glucose analogue (2-NBDG). The results presented  
554 abrogated glucose uptake in DMS-treated infected erythrocytes, imposing a  
555 direct role of host-SphK-1 in regulation of glycolysis (**Fig. 4**).

556 According to a recent study by K Sun et al., SphK-1 activity gets elevated in  
557 erythrocytes under hypoxic conditions, leading to enhanced S1P level and  
558 thereby, increasing its binding to deoxygenated hemoglobin (deoxy-Hb).  
559 Subsequently, this facilitates deoxy-Hb anchorage to the membrane, leading to  
560 more release of membrane-bound GAPDH to the cytosol which then increases  
561 the erythrocytic glycolysis[17]. To further evaluate, whether abolishing the  
562 host-SphK-1 activity in DMS-treated infected erythrocytes, would dysregulate

563 the GAPDH level, we have evaluated the level of GAPDH both in membrane  
564 and cytosolic fractions. The findings unraveled reduced translocation of  
565 GAPDH from membrane-to-cytosol in DMS-treated infected erythrocytes, as  
566 evident from altered localized level of GAPDH, in both immunoblot and  
567 confocal micrographs (**Fig. 5**). To summarize, our study highlights two  
568 important findings; firstly, the inhibition of host SphK-1 activity can abrogate  
569 intra-erythrocytic growth and progression of *P. falciparum*, and secondly,  
570 diminished S1P levels can lead to host-mediated altered glycolysis resulting in  
571 growth retardation of parasites (**Fig. 6**). Overall, this study introduces SphK-  
572 1/S1P signaling nexus in erythrocytes as the alternate pathway for *P. falciparum*  
573 survival. Since, knocking down of host SphK-1 is not lethal, thus targeting the  
574 same would eliminate the problem of resistance. Conceivably, further  
575 elucidation of SphK-1/S1P signaling pathways during parasite infection, might  
576 aid in developing novel anti-malarial chemotherapeutics.

577

## 578 **Acknowledgments**

579 We are thankful to Advanced Instrumentation and Research Facility  
580 (AIRF), Jawaharlal Nehru University (JNU), New Delhi for Central  
581 Instrumentation Facility (CIF) of Special Centre for Molecular Medicine, JNU  
582 for confocal microscopy, LC/MS analysis and other instruments facilities.  
583 This work was supported by Bio-Scientist Award and Innovative Young  
584 Biotechnologist Award (IYBA) from the Department of Biotechnology,  
585 Ministry of Science and Technology, Government of India (DBT). Shailja  
586 Singh is a recipient of the National Bio scientist and IYBA Award from DBT.  
587 R.K.S. is supported by CSIR-UGC fellowship. M.S. is financially supported by  
588 Shiv Nadar Foundation fellowships. We acknowledge the financial support  
589 from Science and Engineering Research Board (SERB, File no.

590 EMR/2016/005644), India, National Institutes of Health (NIH, Grant no.  
591 U19AI089676-09), United States, Department of Science & Technology-  
592 Promotion of University Research and Scientific Excellence (DST-PURSE,  
593 Phase II, JNU), India. The funders had no role in study design, data collection  
594 and analysis, decision to publish, or preparation of the manuscript.

595

### 596 **Competing interests**

597 The authors declare that they have no competing interests.

598

### 599 **Author Contributions**

600 SS conceived and designed the research. RKS performed research and SS,  
601 RKS & SP analyzed the data. RKS and SS conducted the lipid extraction and  
602 estimation experiments. MS and RKS performed microscopy experiments.  
603 SS, RKS, MS & SP wrote the manuscript. SS finally edited the manuscript.

604

### 605 **References**

- 606 1. WHO. World malaria report 2018. Geneva:World Health Organization;  
607 2018. World Malaria Report. 2018. doi:ISBN 978 92 4 1564403
- 608 2. Petersen I, Eastman R, Lanzer M. Drug-resistant malaria : Molecular  
609 mechanisms and implications for public health. 2011;585: 1551–1562.  
610 doi:10.1016/j.febslet.2011.04.042
- 611 3. Neill PMO, Mukhtar A, Stocks PA, Randle LE, Hindley S, Ward SA, et  
612 al. Isoquine and Related Amodiaquine Analogues : A New Generation of  
613 Improved 4-Aminoquinoline Antimalarials. 2003; 4933–4945.  
614 doi:10.1021/jm030796n



- 615 4. Briolant S, Pelleau S, Bogreau H, Hovette P, Zettor A, Castello J, et al. In  
616 vitro susceptibility to quinine and microsatellite variations of the  
617 Plasmodium falciparum Na<sup>+</sup>/H<sup>+</sup> exchanger (Pfnhe-1) gene: The absence  
618 of association in clinical isolates from the Republic of Congo. *Malar J.*  
619 2011; doi:10.1186/1475-2875-10-37
- 620 5. Plowe C V., Roper C, Barnwell JW, Happi CT, Joshi HH, Mbacham W, et  
621 al. World Antimalarial Resistance Network (WARN) III: Molecular  
622 markers for drug resistant malaria. *Malaria Journal.* 2007.  
623 doi:10.1186/1475-2875-6-121
- 624 6. Nolan T. Identifying an essential interaction between malaria parasites and  
625 erythrocytes unlocks the door to promising vaccine targets. *Pathog Glob*  
626 *Health.* 2012; doi:10.1179/204777312x13305103762583
- 627 7. Anderson TJC, Nair S, Nkhoma S, Williams JT, Imwong M, Yi P, et al.  
628 High Heritability of Malaria Parasite Clearance Rate Indicates a Genetic  
629 Basis for Artemisinin Resistance in Western Cambodia. *J Infect Dis.*  
630 2010; doi:10.1086/651562
- 631 8. Miotto O, Amato R, Ashley EA, Macinnis B, Almagro-Garcia J,  
632 Amaratunga C, et al. Genetic architecture of artemisinin-resistant  
633 Plasmodium falciparum. *Nat Genet.* 2015; doi:10.1038/ng.3189
- 634 9. Francis SE, Sullivan DJ, Goldberg and DE. HEMOGLOBIN  
635 METABOLISM IN THE MALARIA PARASITE PLASMODIUM  
636 FALCIPARUM . *Annu Rev Microbiol.* 2002;  
637 doi:10.1146/annurev.micro.51.1.97
- 638 10. Homewood CA. Carbohydrate metabolism of malarial parasites. *Bulletin*  
639 *of the World Health Organization.* 1977.



- 640 11. Olszewski KL, Llinás M. Central carbon metabolism of Plasmodium  
641 parasites. *Mol Biochem Parasitol.* 2011;  
642 doi:10.1016/j.molbiopara.2010.09.001
- 643 12. Ke H, Lewis IA, Morrissey JM, McLean KJ, Ganesan SM, Painter HJ, et  
644 al. Genetic investigation of tricarboxylic acid metabolism during the  
645 plasmodium falciparum life cycle. *Cell Rep.* 2015;  
646 doi:10.1016/j.celrep.2015.03.011
- 647 13. Srivastava A, Philip N, Hughes KR, Georgiou K, MacRae JI, Barrett MP,  
648 et al. Stage-Specific Changes in Plasmodium Metabolism Required for  
649 Differentiation and Adaptation to Different Host and Vector  
650 Environments. *PLoS Pathog.* 2016; doi:10.1371/journal.ppat.1006094
- 651 14. Velanker SS, Ray SS, Gokhale RS, Suma S, Balaram H, Balaram P, et al.  
652 Triosephosphate isomerase from Plasmodium falciparum: The crystal  
653 structure provides insights into antimalarial drug design. *Structure.* 1997;  
654 doi:10.1016/S0969-2126(97)00230-X
- 655 15. Kim J-W, Dang C V. Multifaceted roles of glycolytic enzymes. *Trends*  
656 *Biochem Sci.* 2005; doi:10.1016/j.tibs.2005.01.005
- 657 16. Verlinde CLMJ, Hannaert V, Blonski C, Willson M, Périé JJ, Fothergill-  
658 Gilmore LA, et al. Glycolysis as a target for the design of new anti-  
659 trypanosome drugs. *Drug Resist Updat.* 2001;  
660 doi:10.1054/drup.2000.0177
- 661 17. Sun K, Zhang Y, D'Alessandro A, Nemkov T, Song A, Wu H, et al.  
662 Sphingosine-1-phosphate promotes erythrocyte glycolysis and oxygen  
663 release for adaptation to high-altitude hypoxia. *Nat Commun.* 2016;7: 1–  
664 13. doi:10.1038/ncomms12086

- 665 18. Alvarez SE, Harikumar KB, Hait NC, Allegood J, Strub GM, Kim EY, et  
666 al. Sphingosine-1-phosphate is a missing cofactor for the E3 ubiquitin  
667 ligase TRAF2. *Nature*. 2010; doi:10.1038/nature09128
- 668 19. Jenne CN, Enders A, Rivera R, Watson SR, Bankovich AJ, Pereira JP, et  
669 al. T-bet–dependent S1P 5 expression in NK cells promotes egress from  
670 lymph nodes and bone marrow . *J Exp Med*. 2009;  
671 doi:10.1084/jem.20090525
- 672 20. Camerer E, REGARD JB, Cornelissen I, Srinivasan Y, Duong DN, Palmer  
673 D, et al. Sphingosine-1-phosphate in the plasma compartment regulates  
674 basal and inflammation-induced vascular leak in mice. *J Clin Invest*. 2009;
- 675 21. Inniss K, Moore H. Mediation of Apoptosis and Proliferation of Human  
676 Embryonic Stem Cells by Sphingosine-1-Phosphate. *Stem Cells Dev*.  
677 2007; doi:10.1089/scd.2006.15.789
- 678 22. Hänel P, Andréani P, Gräler MH. Erythrocytes store and release  
679 sphingosine 1-phosphate in blood. *FASEB J*. 2007;21: 1202–1209.  
680 doi:10.1096/fj.06-7433com
- 681 23. Schaphorst KL, Chiang E, Jacobs KN, Zaiman A, Natarajan V, Wigley F,  
682 et al. Role of sphingosine-1 phosphate in the enhancement of endothelial  
683 barrier integrity by platelet-released products. *Am J Physiol Cell Mol*  
684 *Physiol*. 2015; doi:10.1152/ajplung.00311.2002
- 685 24. Bode C, Sensken SC, Peest U, Beutel G, Thol F, Levkau B, et al.  
686 Erythrocytes serve as a reservoir for cellular and extracellular sphingosine  
687 1-phosphate. *J Cell Biochem*. 2010; doi:10.1002/jcb.22507
- 688 25. Le Stunff H, Giussani P, Maceyka M, Lépine S, Milstien S, Spiegel S.

- 689 Recycling of sphingosine is regulated by the concerted actions of  
690 sphingosine-1-phosphate phosphohydrolase 1 and sphingosine kinase 2. *J*  
691 *Biol Chem.* 2007; doi:10.1074/jbc.M703329200
- 692 26. Zhou J, Saba JD. Identification of the first mammalian sphingosine  
693 phosphate lyase gene and its functional expression in yeast. *Biochem*  
694 *Biophys Res Commun.* 1998; doi:10.1006/bbrc.1997.7993
- 695 27. Nakahara K, Ohkuni A, Kitamura T, Abe K, Naganuma T, Ohno Y, et al.  
696 The Sjögren-Larsson Syndrome Gene Encodes a Hexadecenal  
697 Dehydrogenase of the Sphingosine 1-Phosphate Degradation Pathway.  
698 *Mol Cell.* 2012; doi:10.1016/j.molcel.2012.04.033
- 699 28. Maceyka M, Sankala H, Hait NC, Le Stunff H, Liu H, Toman R, et al.  
700 SphK1 and SphK2, sphingosine kinase isoenzymes with opposing  
701 functions in sphingolipid metabolism. *J Biol Chem.* 2005;  
702 doi:10.1074/jbc.M502207200
- 703 29. Ding G, Sonoda H, Yu H, Kajimoto T, Goparaju SK, Jahangeer S, et al.  
704 Protein kinase D-mediated phosphorylation and nuclear export of  
705 sphingosine kinase S. *J Biol Chem.* 2007; doi:10.1074/jbc.M701641200
- 706 30. Hengst JA, Guilford JM, Fox TE, Wang X, Conroy EJ, Yun JK.  
707 Sphingosine kinase 1 localized to the plasma membrane lipid raft  
708 microdomain overcomes serum deprivation induced growth inhibition.  
709 *Arch Biochem Biophys.* 2009; doi:10.1016/j.abb.2009.09.013
- 710 31. Vu TM, Ishizu AN, Foo JC, Toh XR, Zhang F, Whee DM, et al. Mfsd2b  
711 is essential for the sphingosine-1-phosphate export in erythrocytes and  
712 platelets. *Nature.* 2017;550: 524–528. doi:10.1038/nature24053

- 713 32. Low PS, Rathinavelu P, Harrison ML. Regulation of glycolysis via  
714 reversible enzyme binding to the membrane protein, band 3. *J Biol Chem.*  
715 1993;
- 716 33. Trager W, Jensen JB. Human malaria parasites in continuous culture.  
717 *Science* (80- ). 1976; doi:10.1126/science.781840
- 718 34. Zhao Z, Xu Y. An extremely simple method for extraction of  
719 lysophospholipids and phospholipids from blood samples. *J Lipid Res.*  
720 2010;51: 652–659. doi:10.1194/jlr.D001503
- 721 35. Kobayashi N, Otsuka M, Yamaguchi A, Nishi T. Fluorescence-based  
722 rapid measurement of sphingosine-1-phosphate transport activity in  
723 erythrocytes. *J Lipid Res.* 2016;57: 2088–2094. doi:10.1194/jlr.D071068
- 724 36. Van Niekerk DD, Penkler GP, Du Toit F, Snoep JL. Targeting glycolysis  
725 in the malaria parasite *Plasmodium falciparum*. *FEBS J.* 2016;  
726 doi:10.1111/febs.13615
- 727 37. van Schalkwyk DA, Priebe W, Saliba KJ. The Inhibitory Effect of 2-Halo  
728 Derivatives of D-Glucose on Glycolysis and on the Proliferation of the  
729 Human Malaria Parasite *Plasmodium falciparum*. *J Pharmacol Exp Ther.*  
730 2008; doi:10.1124/jpet.108.141929
- 731 38. O’Neil RG, Wu L, Mullani N. Uptake of a fluorescent deoxyglucose  
732 analog (2-NBDG) in tumor cells. *Mol Imaging Biol.* 2005;  
733 doi:10.1007/s11307-005-0011-6
- 734 39. Zou C, Wang Y, Shen Z. 2-NBDG as a fluorescent indicator for direct  
735 glucose uptake measurement. *J Biochem Biophys Methods.* 2005;  
736 doi:10.1016/j.jbbm.2005.08.001

- 737 40. Nitin, Carlson AL, Muldoon T, El-Naggar AK, Gillenwater A, Richards-  
738 Kortum R. Molecular imaging of glucose uptake in oral neoplasia  
739 following topical application of fluorescently labeled deoxy-glucose. *Int J*  
740 *Cancer*. 2009; doi:10.1002/ijc.24222
- 741 41. Pappu R, Schwab SR, Cornelissen I, Pereira JP, Regard JB, Xu Y, et al.  
742 Promotion of lymphocyte egress into blood and lymph by distinct sources  
743 of sphingosine-1-phosphate. *Science* (80- ). 2007;  
744 doi:10.1126/science.1139221
- 745 42. Ishii M, Egen JG, Klauschen F, Meier-Schellersheim M, Saeki Y, Vacher  
746 J, et al. Sphingosine-1-phosphate mobilizes osteoclast precursors and  
747 regulates bone homeostasis. *Nature*. 2009; doi:10.1038/nature07713
- 748 43. Sankala HM, Hait NC, Paugh SW, Shida D, Lépine S, Elmore LW, et al.  
749 Involvement of sphingosine kinase 2 in p53-independent induction of p21  
750 by the chemotherapeutic drug doxorubicin. *Cancer Res*. 2007;  
751 doi:10.1158/0008-5472.CAN-07-2090
- 752 44. Di Pardo A, Pepe G, Castaldo S, Marracino F, Capocci L, Amico E, et al.  
753 Stimulation of Sphingosine Kinase 1 (SPHK1) Is Beneficial in a  
754 Huntington's Disease Pre-clinical Model. *Front Mol Neurosci*. 2019;  
755 doi:10.3389/fnmol.2019.00100
- 756 45. Sun M, Du B, Shi Y, Lu Y, Zhou Y, Liu B. Combined Signature of the  
757 Fecal Microbiome and Plasma Metabolome in Patients with Ulcerative  
758 Colitis. *Med Sci Monit*. 2019; doi:10.12659/MSM.916009
- 759 46. Maceyka M, Harikumar KB, Milstien S, Spiegel S. Sphingosine-1-  
760 phosphate signaling and its role in disease. 2013;22: 50–60.  
761 doi:10.1016/j.tcb.2011.09.003.

- 762 47. Obinata H, Hla T. Sphingosine 1-phosphate and inflammation. *Int*  
763 *Immunol.* 2019; doi:10.1093/intimm/dxz037
- 764 48. Pyne NJ, McNaughton M, Boomkamp S, MacRitchie N, Evangelisti C,  
765 Martelli AM, et al. Role of sphingosine 1-phosphate receptors,  
766 sphingosine kinases and sphingosine in cancer and inflammation.  
767 *Advances in Biological Regulation.* 2016. doi:10.1016/j.jbior.2015.09.001
- 768 49. Arish M, Husein A, Ali R, Tabrez S, Naz F, Ahmad MZ, et al.  
769 Sphingosine-1-phosphate signaling in *Leishmania donovani* infection in  
770 macrophages. *PLoS Negl Trop Dis.* 2018;12.  
771 doi:10.1371/journal.pntd.0006647
- 772 50. Dominguez MR, Ersching J, Lemos R, Machado A V., Bruna-Romero O,  
773 Rodrigues MM, et al. Re-circulation of lymphocytes mediated by  
774 sphingosine-1-phosphate receptor-1 contributes to resistance against  
775 experimental infection with the protozoan parasite *Trypanosoma cruzi*.  
776 *Vaccine.* 2012; doi:10.1016/j.vaccine.2012.02.037
- 777 51. Finney CAM, Hawkes CA, Kain DC, Dhabangi A, Musoke C, Cserti-  
778 Gazdewich C, et al. S1P Is Associated with Protection in Human and  
779 Experimental Cerebral Malaria. *Mol Med.* 2011;  
780 doi:10.2119/molmed.2010.00214
- 781 52. Wein S, Ghezal S, Buré C, Maynadier M, Périgaud C, Vial HJ, et al.  
782 Contribution of the precursors and interplay of the pathways in the  
783 phospholipid metabolism of the malaria parasite. *J Lipid Res.* 2018;  
784 doi:10.1194/jlr.m085589
- 785 53. Gulati S, Ekland EH, Ruggles K V., Chan RB, Jayabalasingham B, Zhou  
786 B, et al. Profiling the Essential Nature of Lipid Metabolism in Asexual

787 Blood and Gametocyte Stages of *Plasmodium falciparum*. *Cell Host*  
788 *Microbe*. 2015;18: 371–381. doi:10.1016/j.chom.2015.08.003

789 54. Tran PN, Brown SHJ, Rug M, Ridgway MC, Mitchell TW, Maier AG.  
790 Changes in lipid composition during sexual development of the malaria  
791 parasite *Plasmodium falciparum*. *Malar J*. 2016; doi:10.1186/s12936-016-  
792 1130-z

793 55. Mehta M, Sonawat HM, Sharma S. Glycolysis in *Plasmodium falciparum*  
794 results in modulation of host enzyme activities. *J Vector Borne Dis*. 2006;

795

796 **Figure 1. Inhibition of host SphK-1 by specific inhibitor DMS causes**  
797 **decrease in SphK-1 protein level and S1P levels. a)** Confocal micrographs  
798 demonstrate altered host SphK-1 level in mixed-stage parasite culture following  
799 treatment with DMS (10  $\mu$ M). Bar graph denotes the differential mean  
800 fluorescence intensity (MFI) denoting host SphK-1 level in infected and  
801 uninfected erythrocytes following DMS treatment. **b)** Evaluation of level and  
802 phosphorylation status of SphK-1 by immunoblotting. Total cell lysates probed  
803 with GAPDH was used as a loading control. The graph represents fold change  
804 in the band intensity in individual lanes. **c)** Bar graph depicts ELISA-based S1P  
805 quantification in IC and EC microenvironments of infected and uninfected  
806 erythrocytes. **d)** NBD-Sphingosine-1-phosphate is localized to membrane and  
807 parasite. Infected erythrocyte were resuspended in buffer containing fatty acid-  
808 free BSA (0.1% (w/v)) and incubated with DMS (10  $\mu$ M) or NBD-sphingosine  
809 (1  $\mu$ M) for at least 15 min at 37 °C. The Infected erythrocytes were imaged by  
810 fluorescence using a 100 $\times$  oil objective on a Nikon Ti2 microscope.

811



812 **Figure 2. Inhibition of host SphK-1 blocks parasite growth and**  
813 **progression.** A) Percentage inhibition of *P. falciparum* growth was evaluated at  
814 different DMS concentrations (0-40  $\mu$ M), as presented in the bar graph. Three  
815 independent experiments were performed in triplicates with 96-well plates using  
816 a SYBR-green assay. The IC<sub>50</sub> value was determined as 14  $\mu$ M for the parasite  
817 growth inhibition with DMS. B) Visualization of stage specific inhibition of *P.*  
818 *falciparum* progression following DMS treatment was depicted by light  
819 microscopic images of Giemsa stained ring, trophozoite and schizont stages. C)  
820 Scanning electron micrographs of DMS-treated infected and uninfected  
821 erythrocytes represented comparative morphometric analysis. Scale bars = 5  $\mu$   
822 m

823

824 **Figure 3. Inhibition of host SphK-1 results in reduction of lactate**  
825 **production.** A) Quantification of lactate in EC microenvironments of  
826 uninfected and infected erythrocytes treated with DMS (10  $\mu$ M), was  
827 represented as changes in relative intensities. B) Evaluation of lactate levels in  
828 asexual blood stages following DMS treatment, was plotted as percentage fold  
829 change. C) Light microscopic images of saponized/host-free trophozoites and  
830 percoll purified trophozoites were visually compared following Giemsa-  
831 staining. Following identification, the purified and saponized samples were  
832 further used for above experiment. Representative bar graph displayed changes  
833 in lactate levels as relative intensities for trophozoites and saponized/host-free  
834 parasites

835 **Figure 4. Detection of glucose uptake by parasite infected erythrocytes**  
836 **upon host SphK-1 inhibition.** A) Evaluation of 2-NBDG uptake in parasite  
837 infected erythrocytes following DMS treatment by live-cell imaging. Respective



838 MFI of individual infected erythrocytes were plotted against individual  
839 untreated cells. **B)** Representative histograms depict changes in number of  
840 FITC<sup>positive</sup> population in flow cytometry analysis correlating to 2-NBDG uptake  
841 following DMS treatment in infected erythrocytes.

842 **Figure 5. Host SphK-1 mediated translocation of GAPDH in parasite**  
843 **infected erythrocytes. A)** Detection of localized level of GAPDH in both  
844 membrane and cytosolic fractions of DMS-treated infected erythrocytes. Total  
845 cell lysate was used as a loading control. Change in the level was plotted as  
846 relative intensities of bands detected in different cellular fractions. **B)** Confocal  
847 micrographs demonstrate GAPDH level and localization in both DMS-treated  
848 and untreated infected erythrocytes.

849 **Figure 6.** In the proposed working model, life cycle of blood stage parasite is  
850 shown. In normal condition, S1P bind to deoxy-Hb and facilitates binding of  
851 deoxy-Hb to membrane and release of GAPDH; increased cytosolic GAPDH  
852 accelerates glycolysis and generate lactate which is a by-product of glycolysis  
853 and does not stall the growth of parasite. In case of DMS-mediated inhibition of  
854 host SphK-1, S1P level gets reduced, leading to altered binding with deoxy-Hb.  
855 Thus, it does not facilitate GAPDH to cytosol due to which glycolysis is  
856 suppressed leading to retarded parasite growth.

857

858

859

860

861

862

863

864

865

866

867

868

869

**Figure 1**

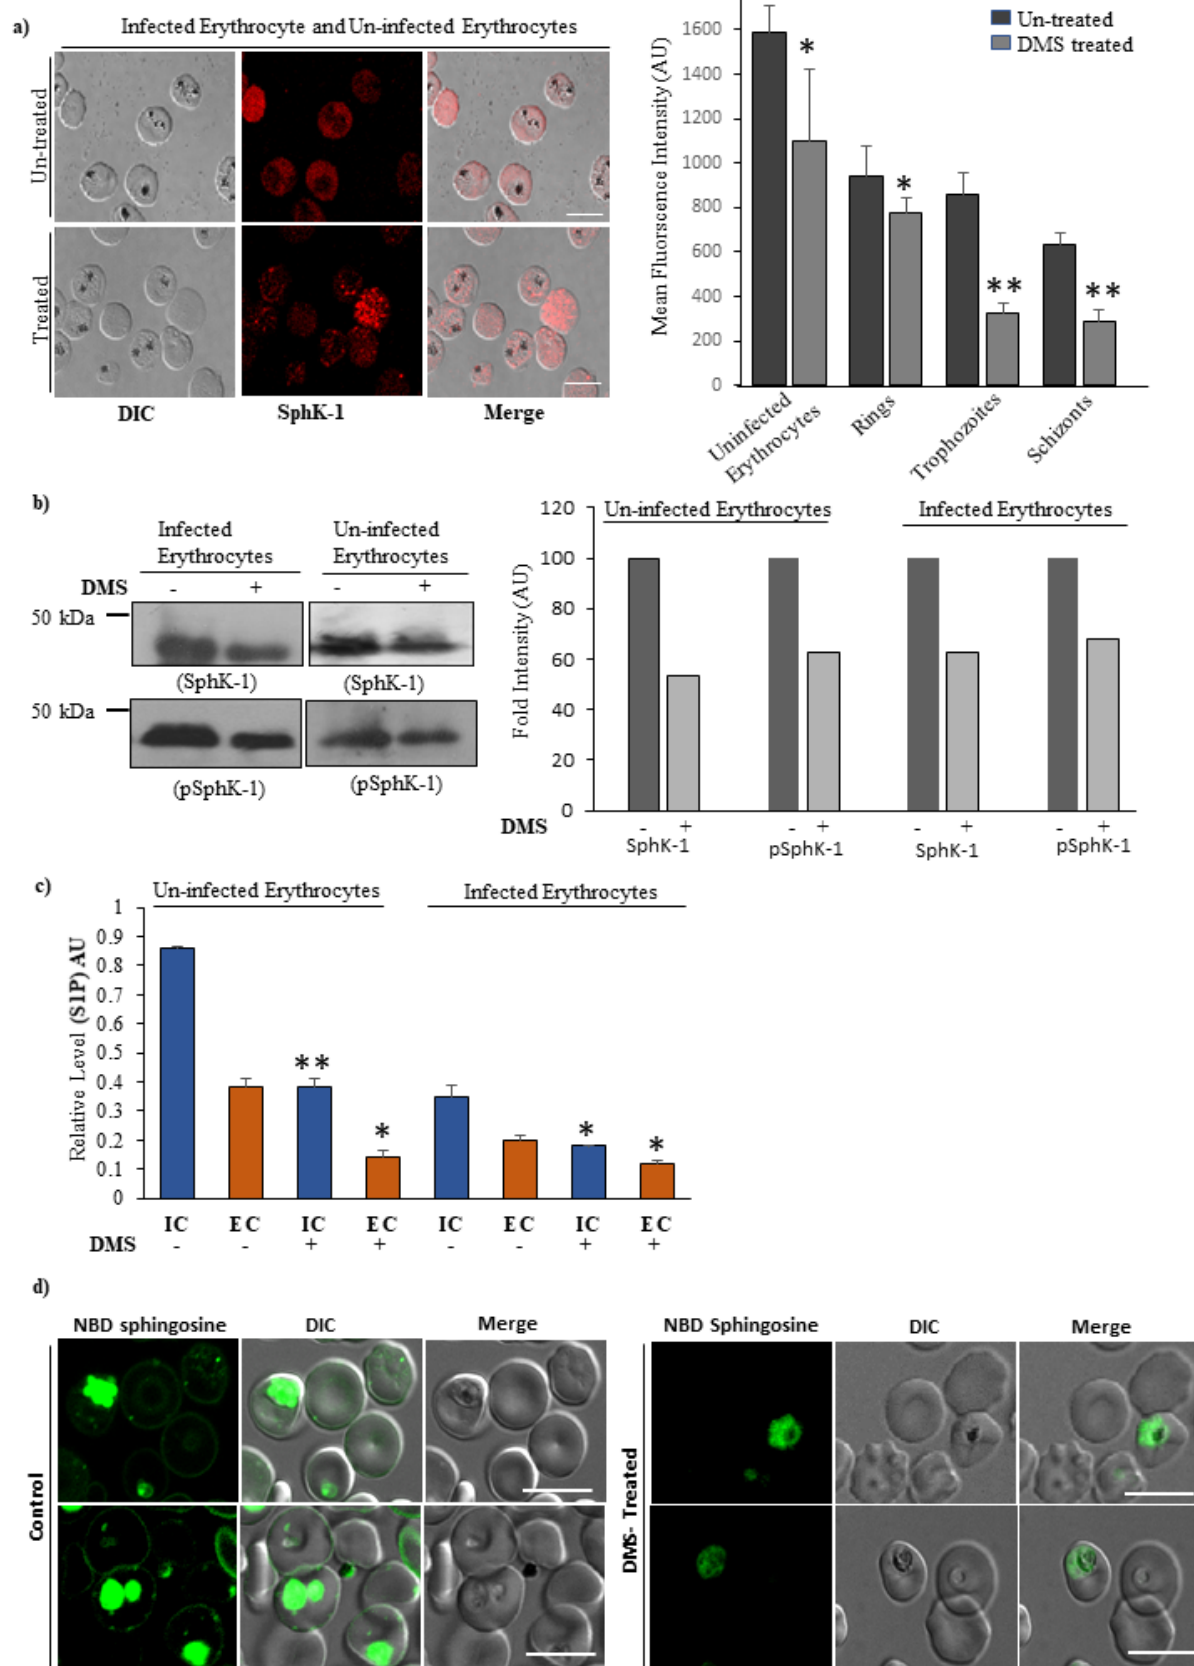

**Figure 2**

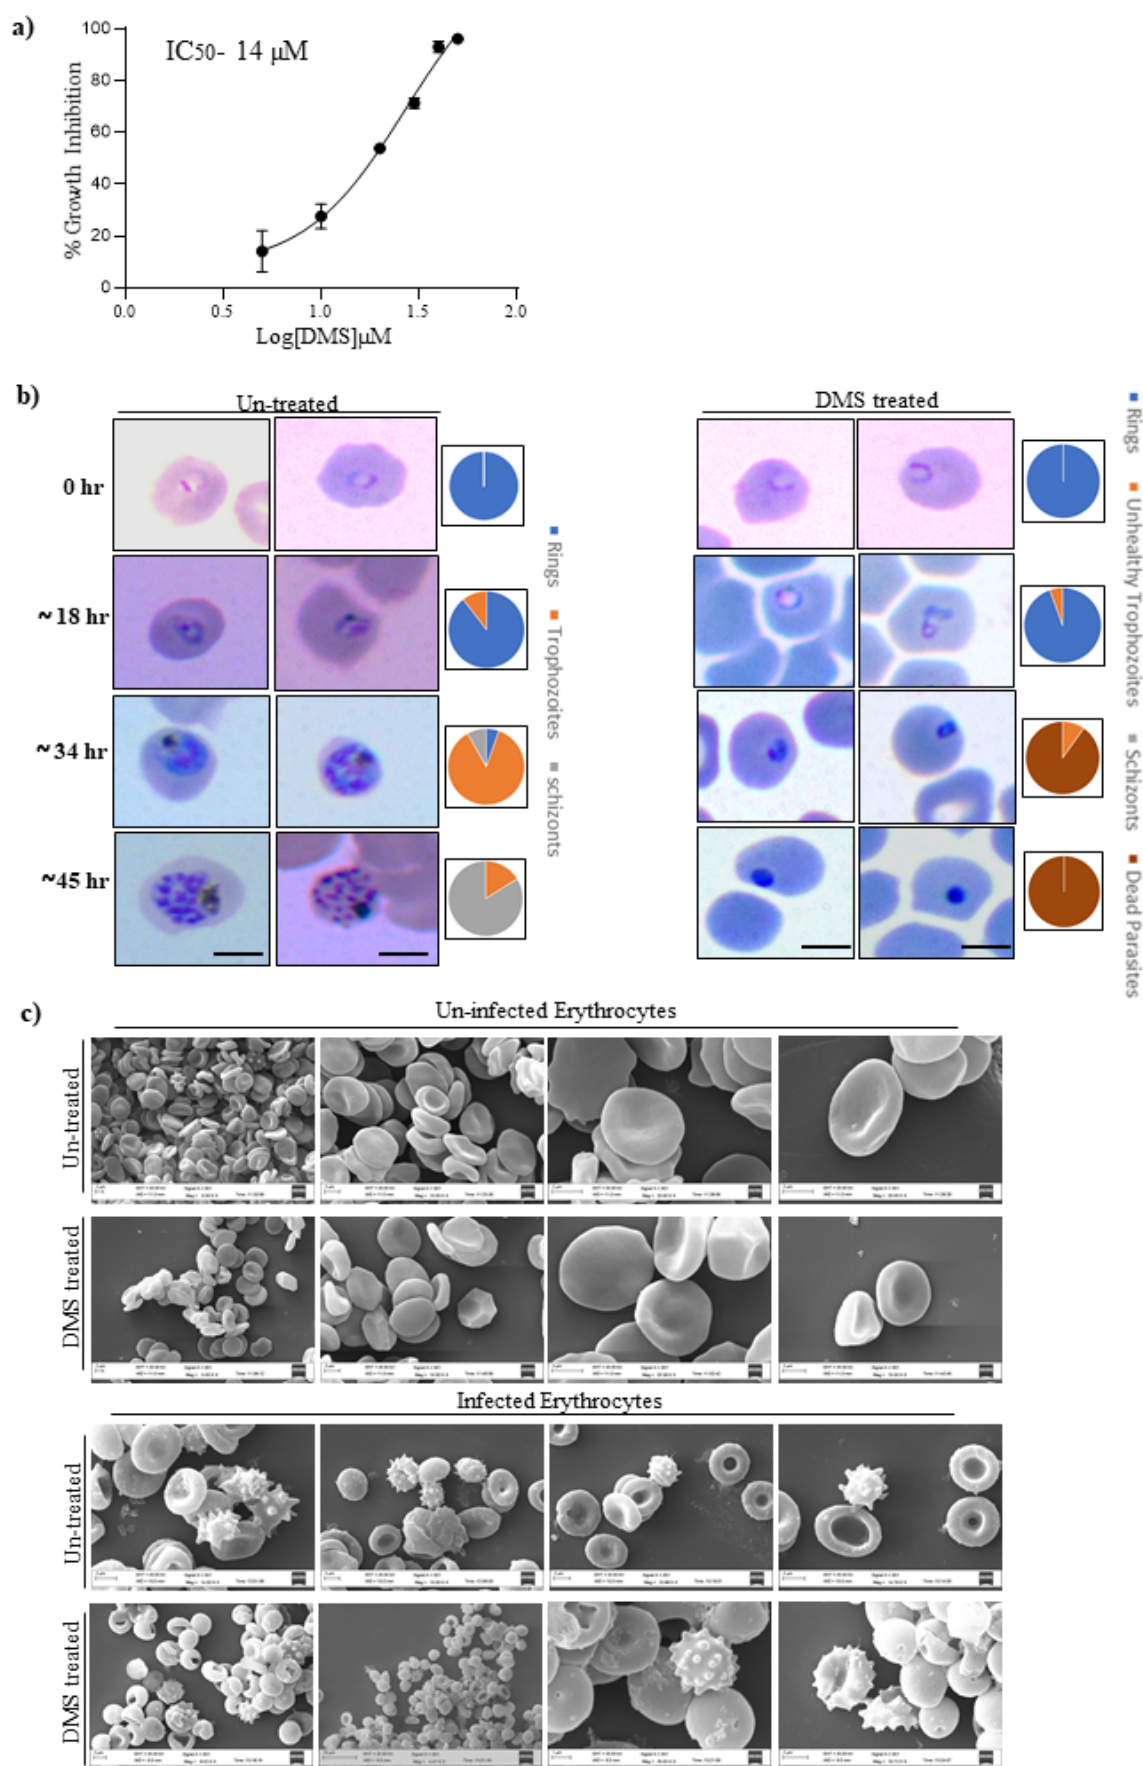

**Figure 3**

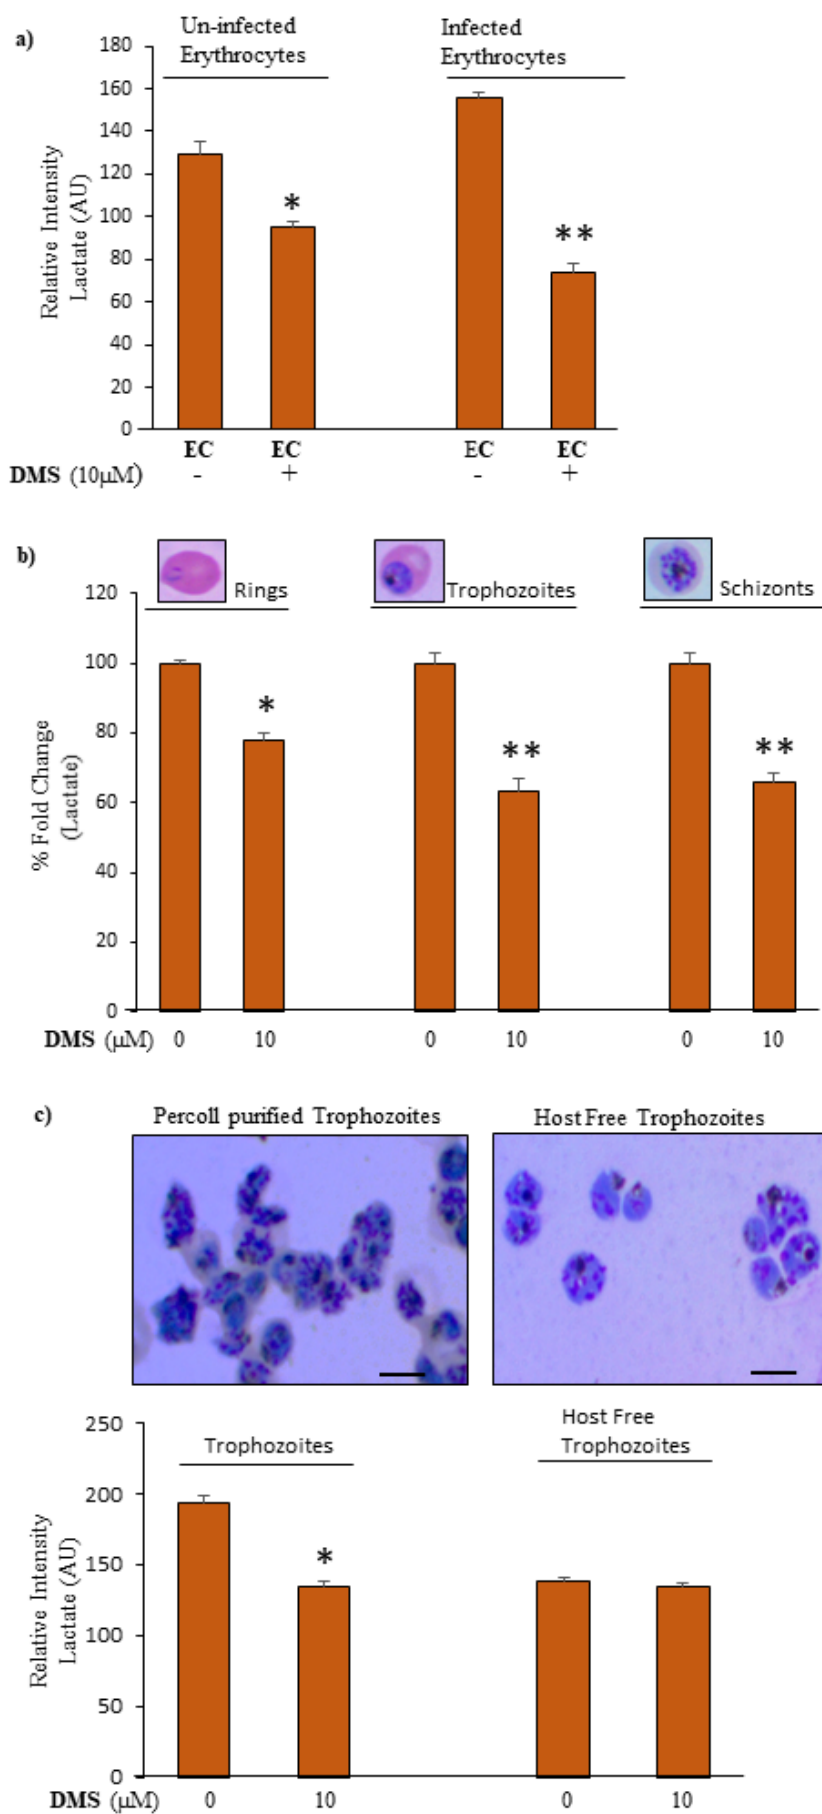

**Figure 4**

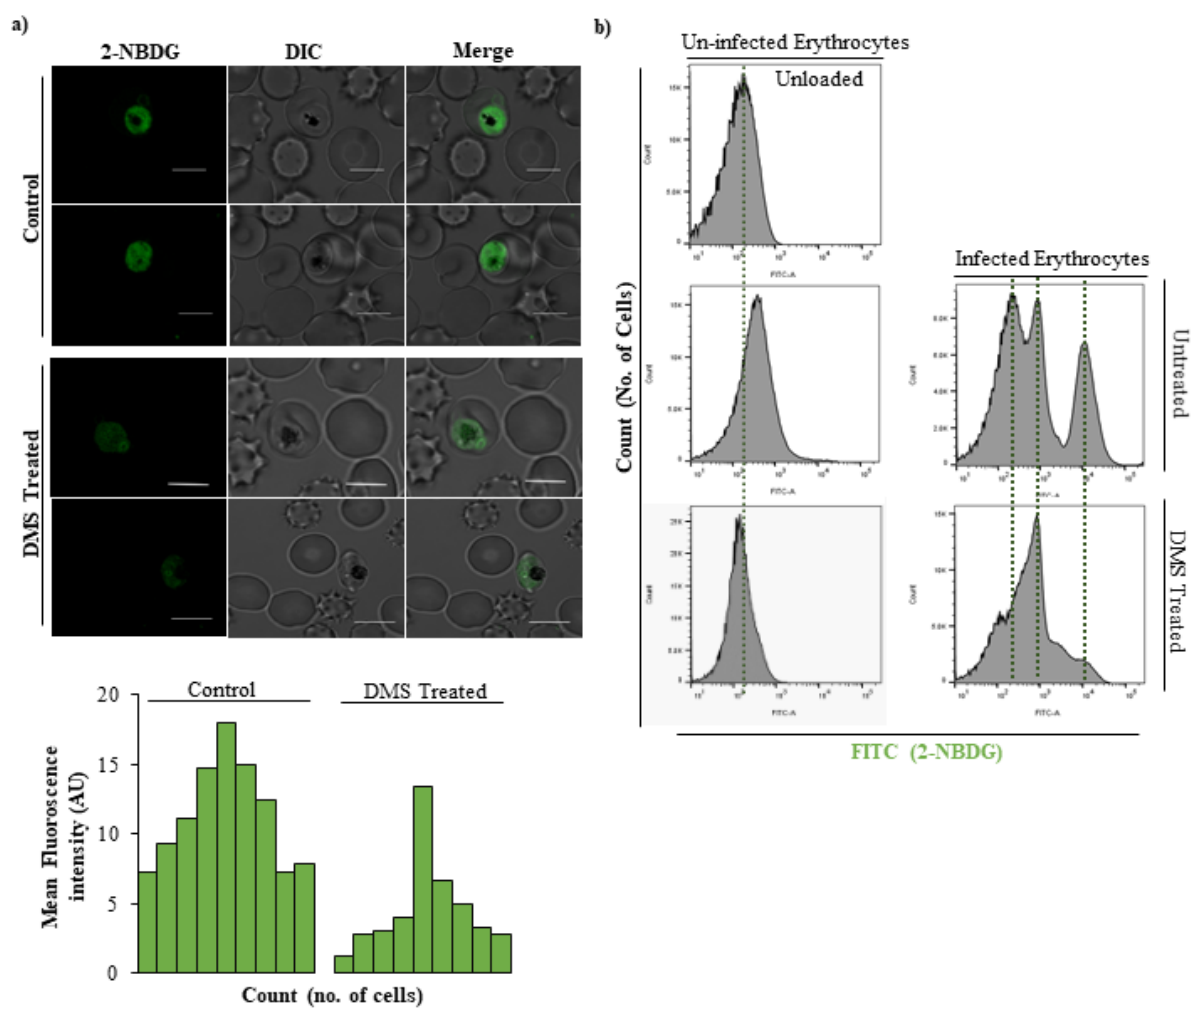

873

**Figure 5**

a)

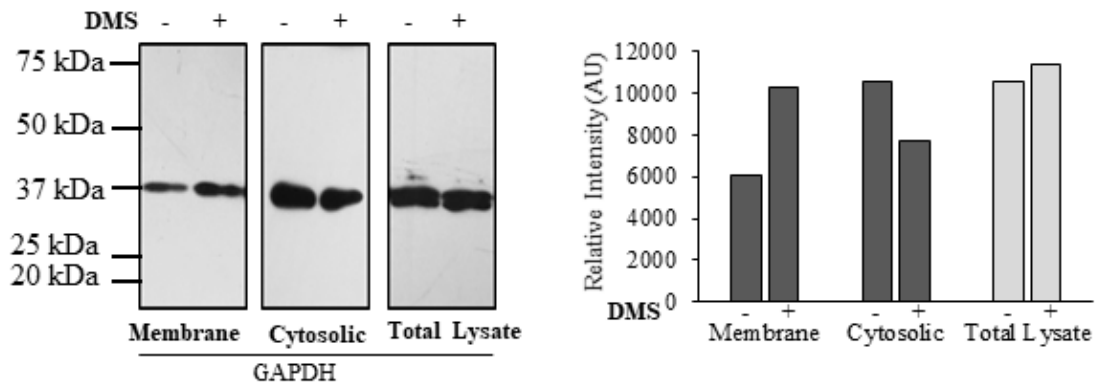

b)

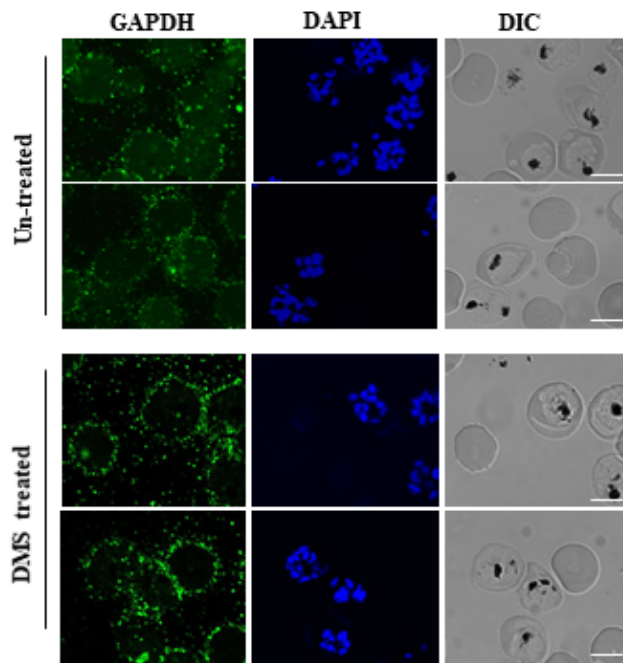

874



Figure 6

a)

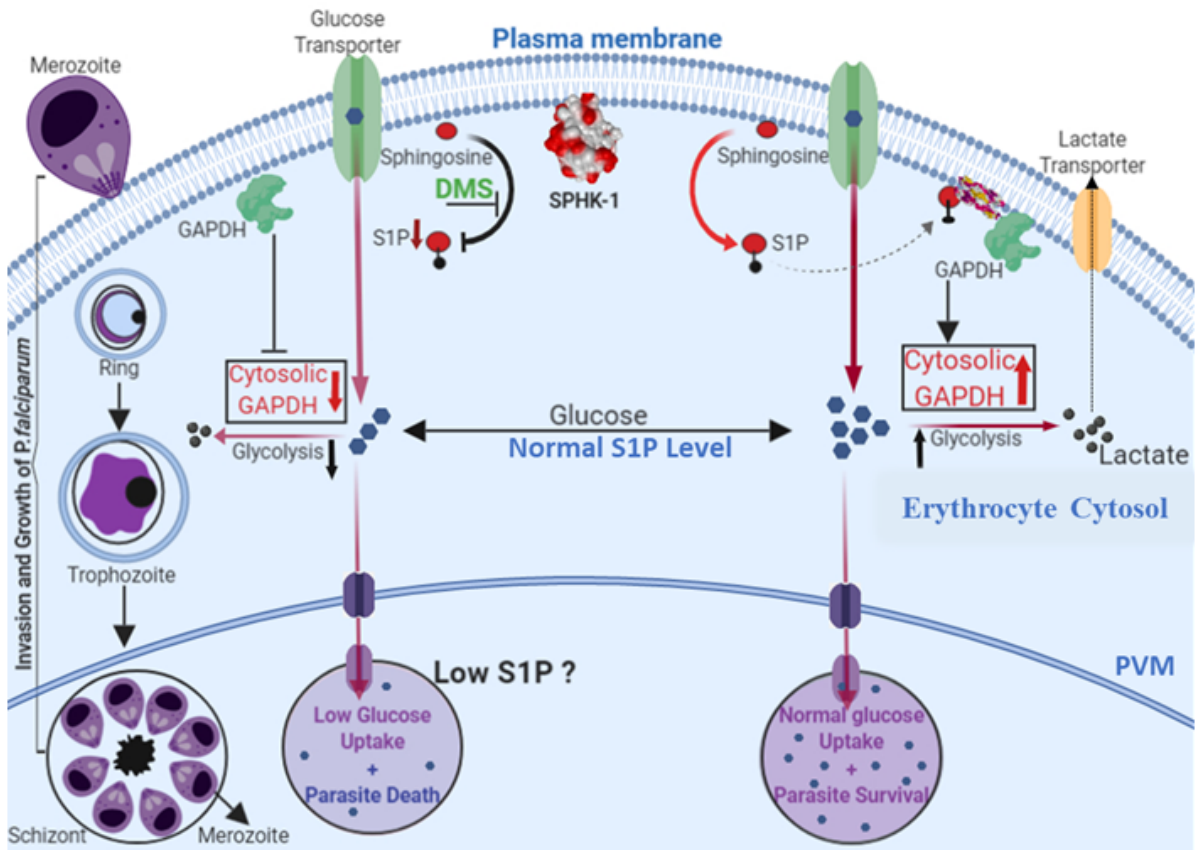

875

876
